# Supplementary material
Source: PubMed Central journal article supplement (PMC6800817)

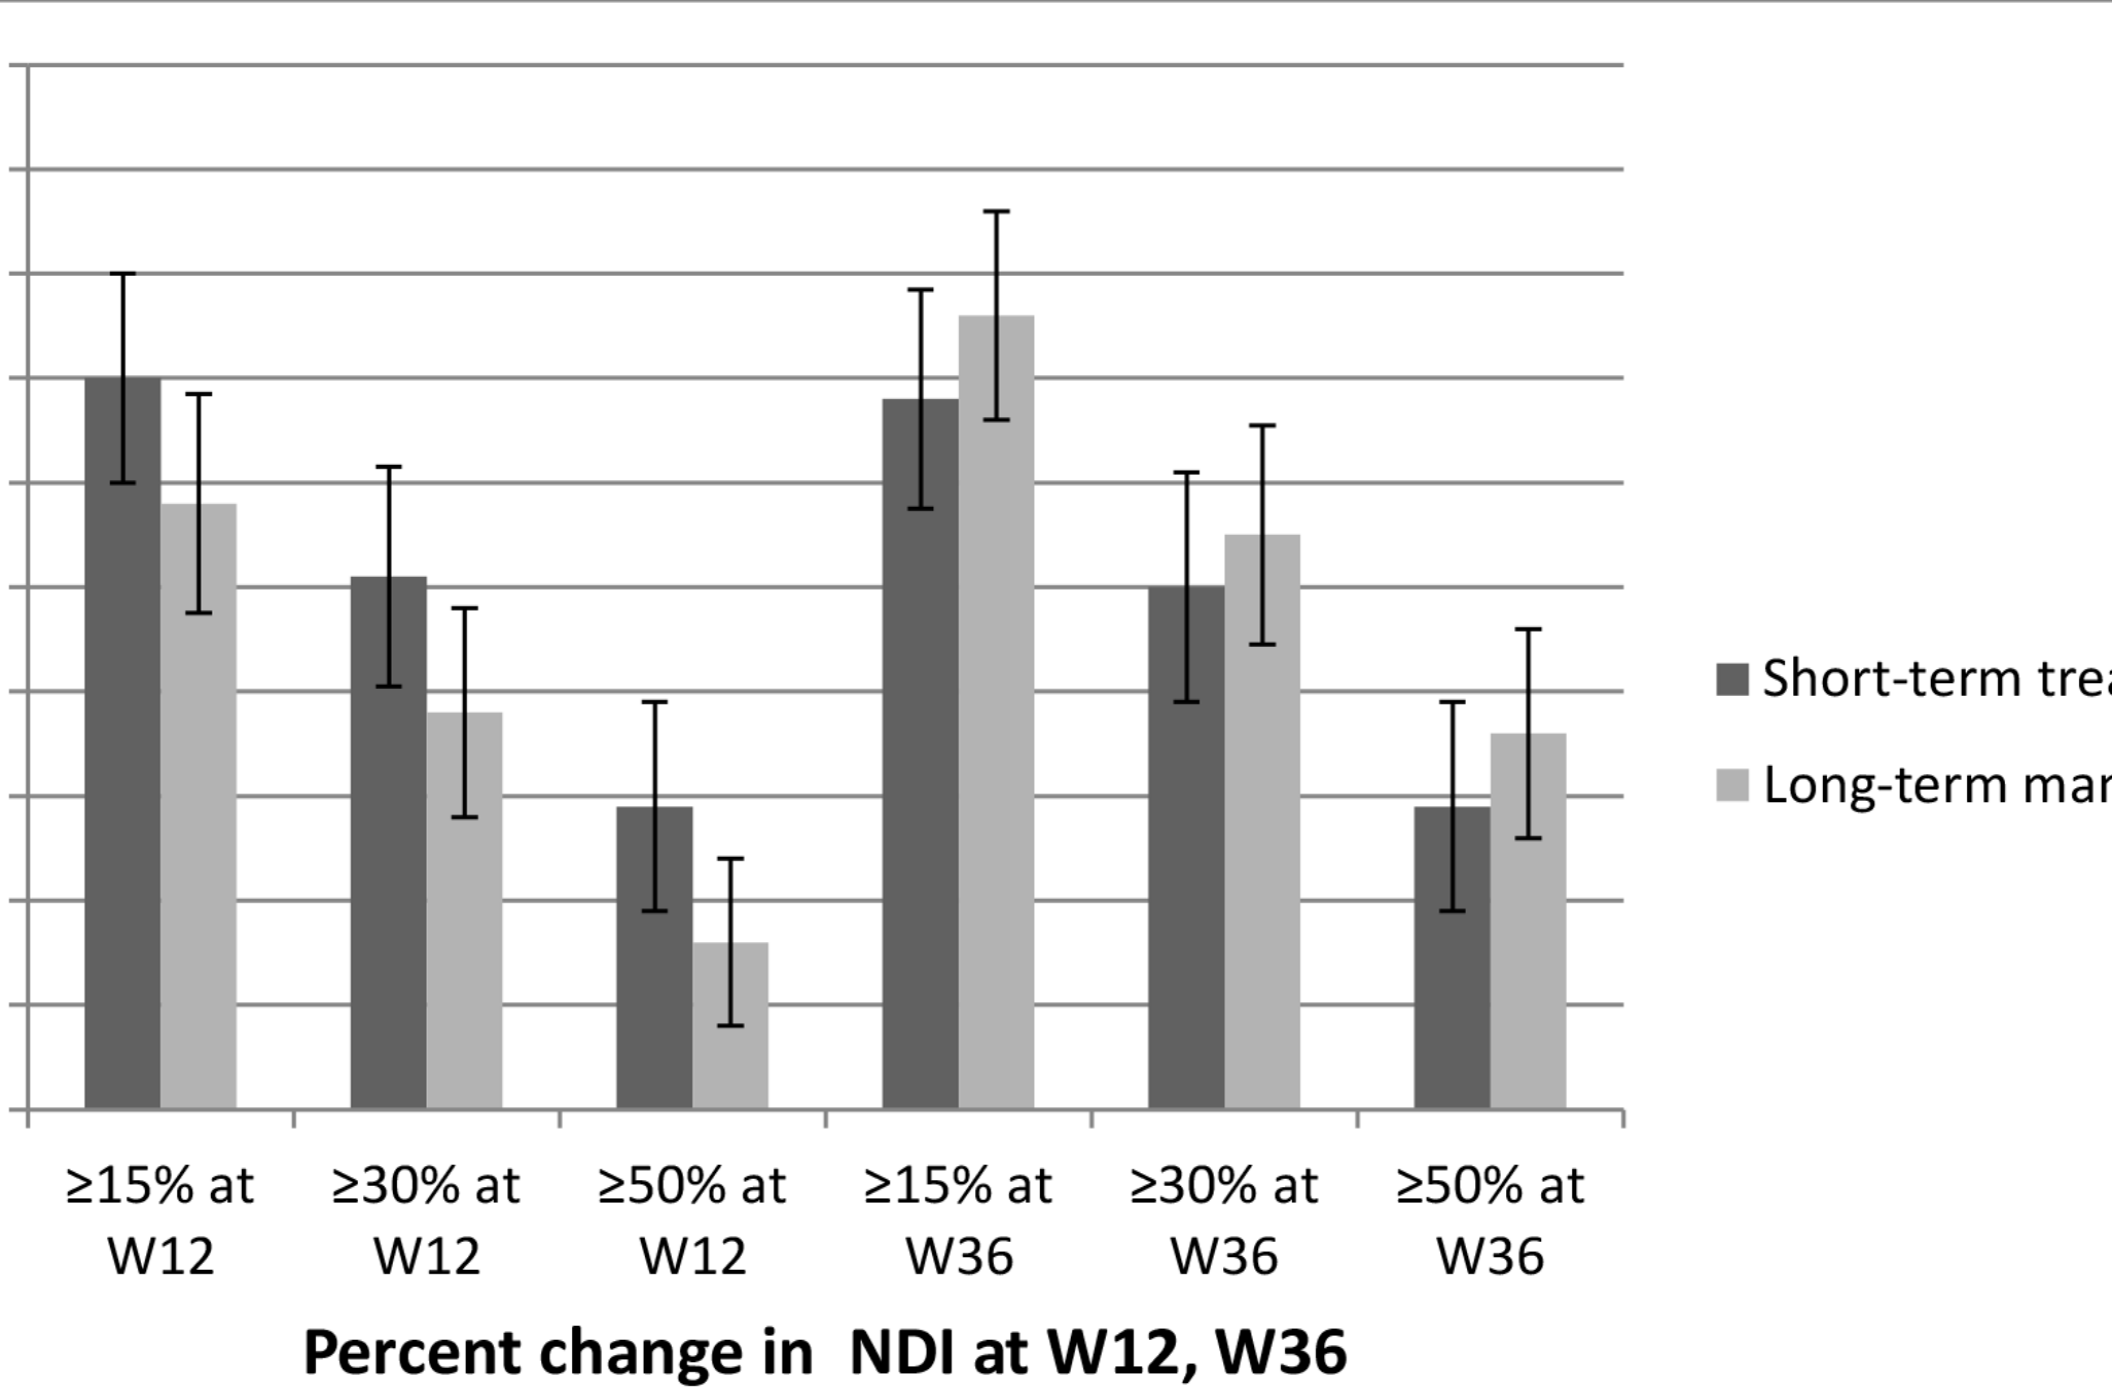

Supplement: NIHMS1052395-supplement-SF1.pdf [file NIHMS1052395-supplement-SF1.pdf]

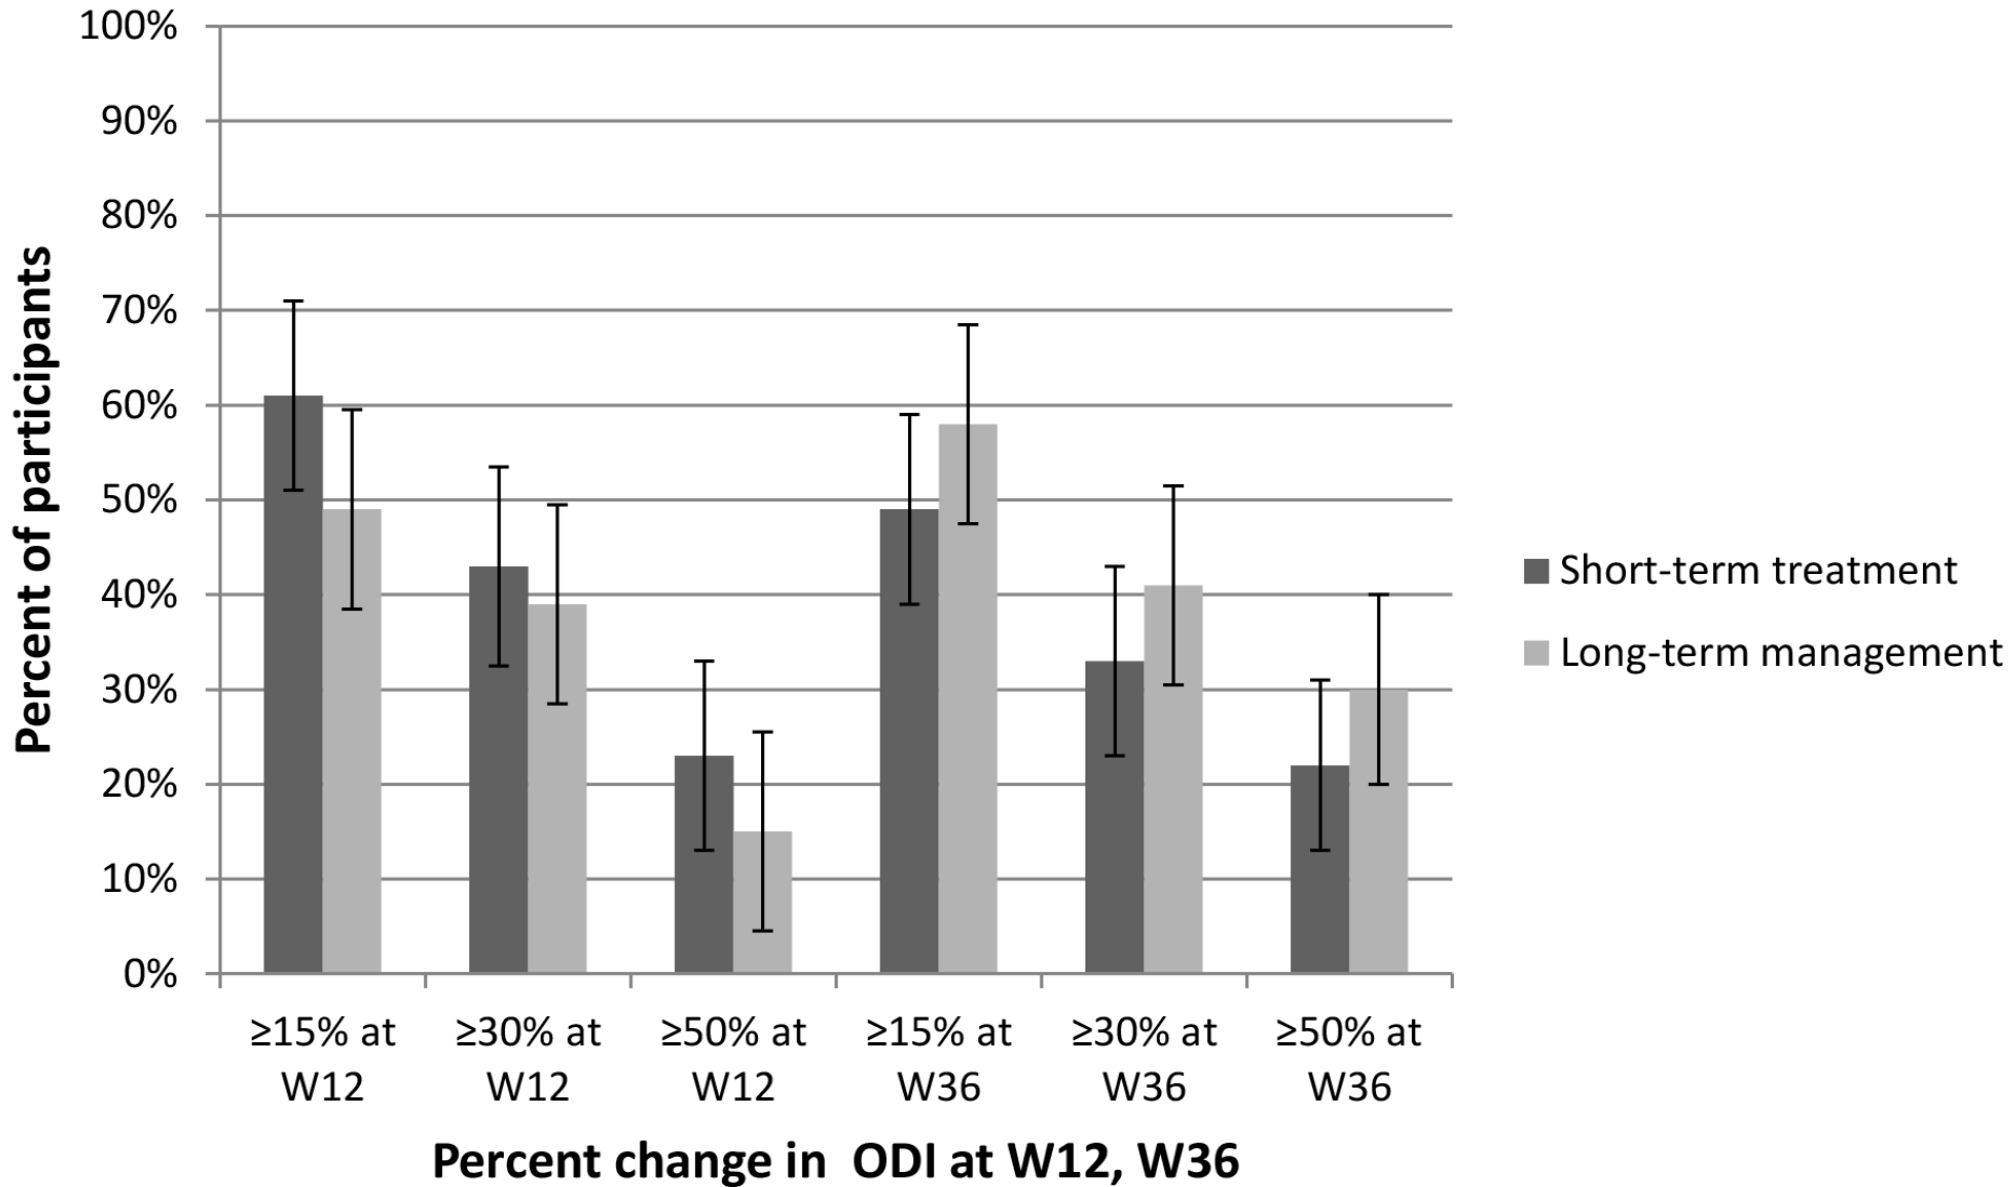

Supplement: NIHMS1052395-supplement-SF2.pdf [file NIHMS1052395-supplement-SF2.pdf]
